# Supplementary material
Source: PubMed Central journal article supplement (PMC1159134)
Supplement: JCI0524015.sd.pdf [file JCI0524015.sd.pdf]

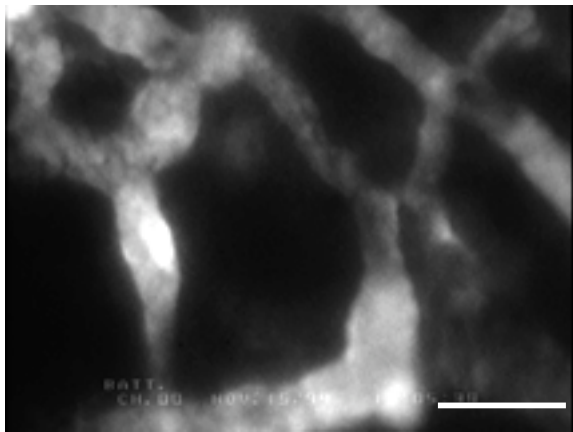

**B16F1**

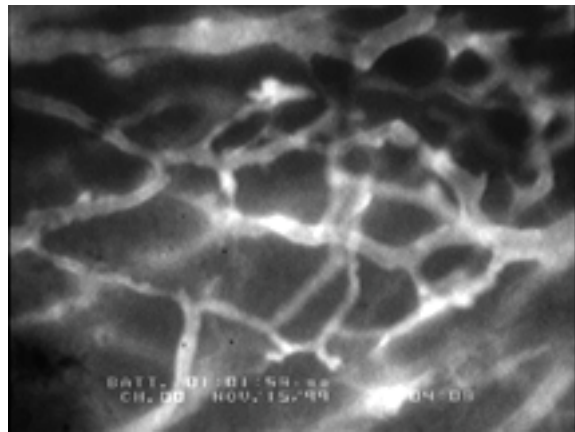

**B16F10**

**Supplemental Figure S1**

Representative microangiography images of B16F1 and B16F10 tumors grown in the cranial windows. FITC-dextran (2 million MW) was injected systemically to visualize blood vessels. Bar = 100  $\mu$ m.

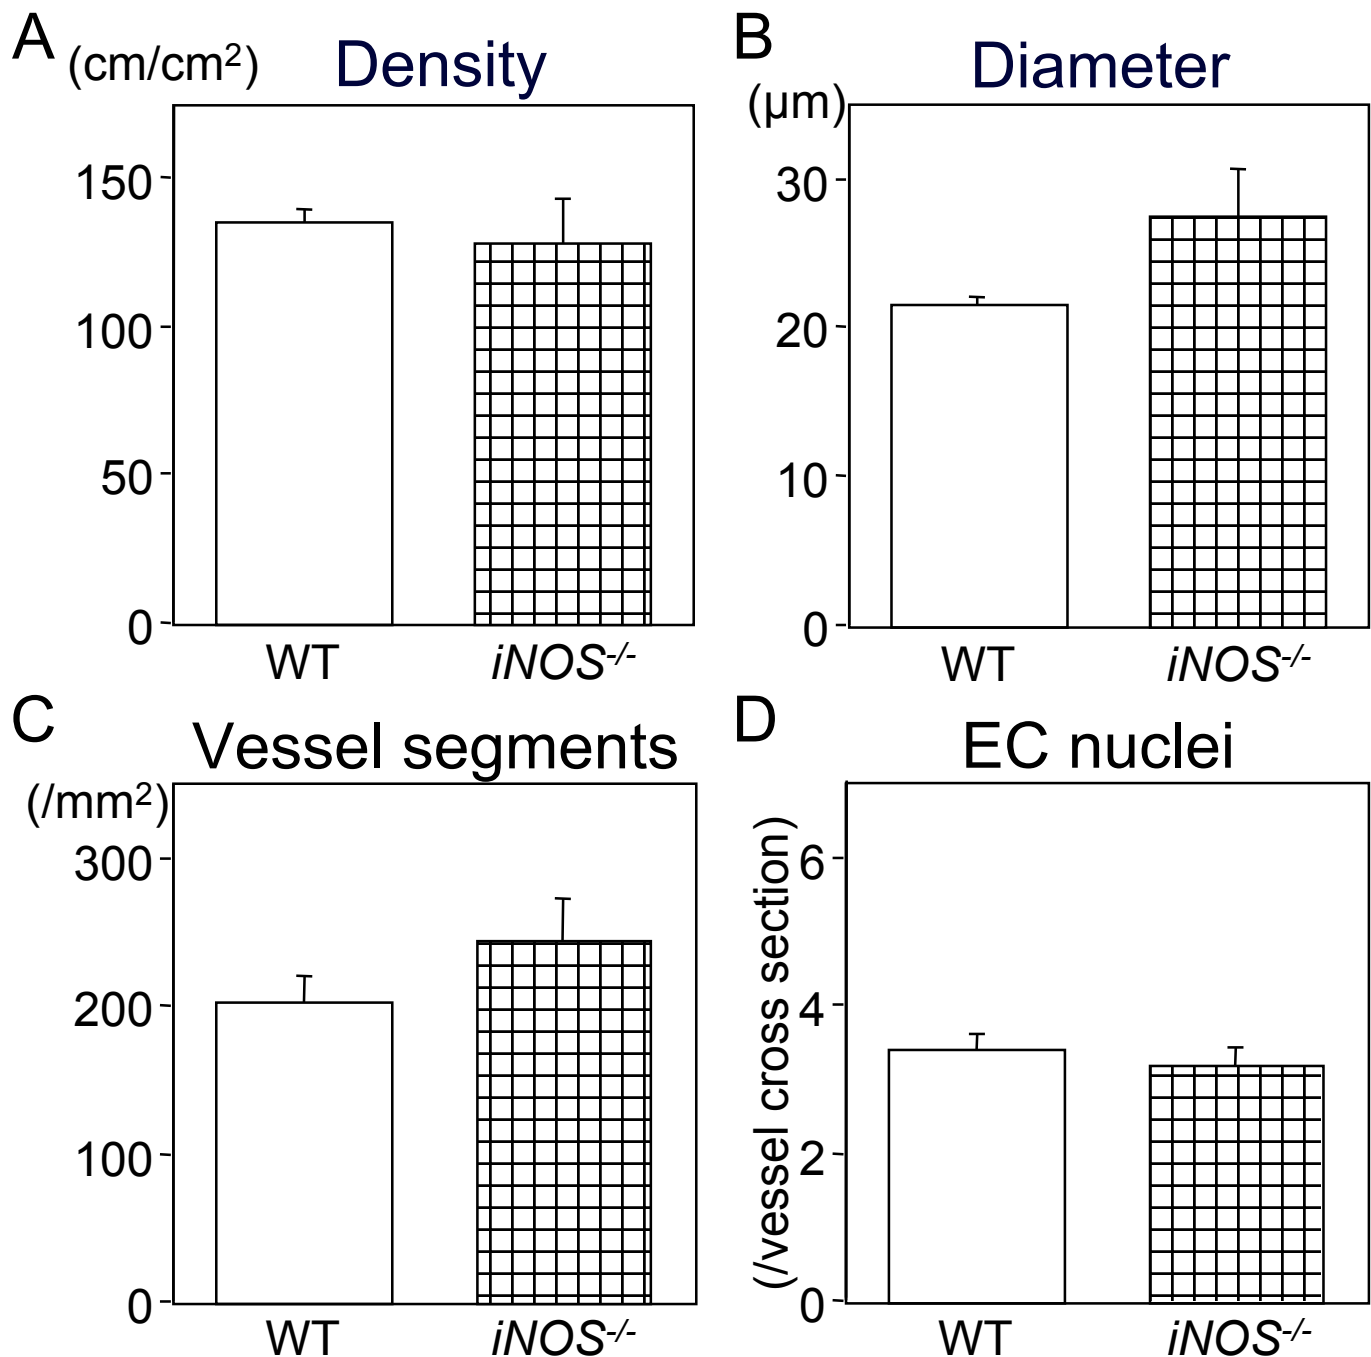

**Supplemental Figure S2**

Effect of host iNOS deletion on B16F10 tumor vessels in the cranial window.

(A-C) Vessel parameters quantified by off line analyses of the digitized microangiography images. There was no significant difference between wild-type C57BL/6 (n=5) and *iNOS*<sup>-/-</sup> mice (n=5) in vascular density (A), vessel diameter (B) and branching (C). (D) Histological quantification of endothelial cell nuclei per vessel cross-section in B16F10 tumors grown in C57BL/6 (132 vessels in 3 tumors, 5 locations in each) or *iNOS*<sup>-/-</sup> mice (134 vessels in 3 tumors, 5 locations in each).

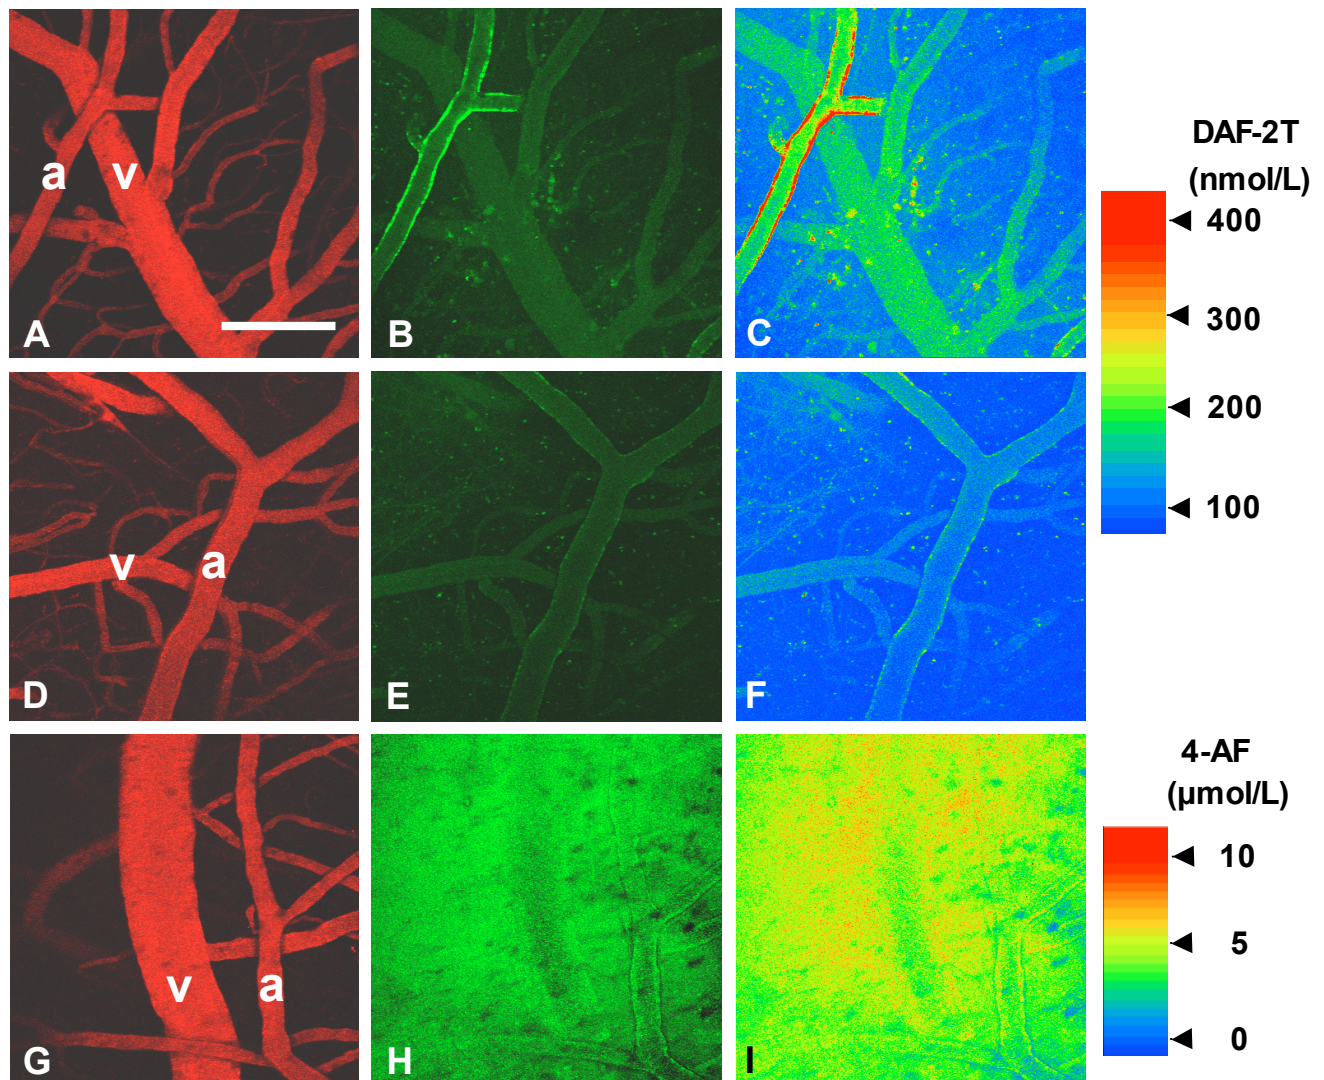

### Supplemental Figure S3

Effects of the acute (24hrs) application of L-NMMA on the DAF-2 associated fluorescence in the pial microvessels. (A, C, D), microangiography using tetramethylrhodamine-dextran (2 million MW); (B, E), Representative microfluorography captured after the 60-minute loading of DAF-2; (C, F), pseudocolor representation of DAF-2 microfluorographs. The animals were treated with D-NMMA (A-C) or L-NMMA (D-F). Note that DAF-2 associated fluorescence mainly distributed along the arteriole and was abolished with L-NMMA treatment. Color bars in the top right represent calibration of the pseudocolor with known concentrations of DAF-2T. (G-I), microangiograph (G), microfluorograph captured at 60 minutes after injection of 4-AF (H), an NO-insensitive control fluorochrome, and its pseudocolor representation (I). Color bars in the bottom right shows calibration with known concentrations of 4-AF. *a*, arteriole; *v*, venule, Bar = 100  $\mu\text{m}$ .

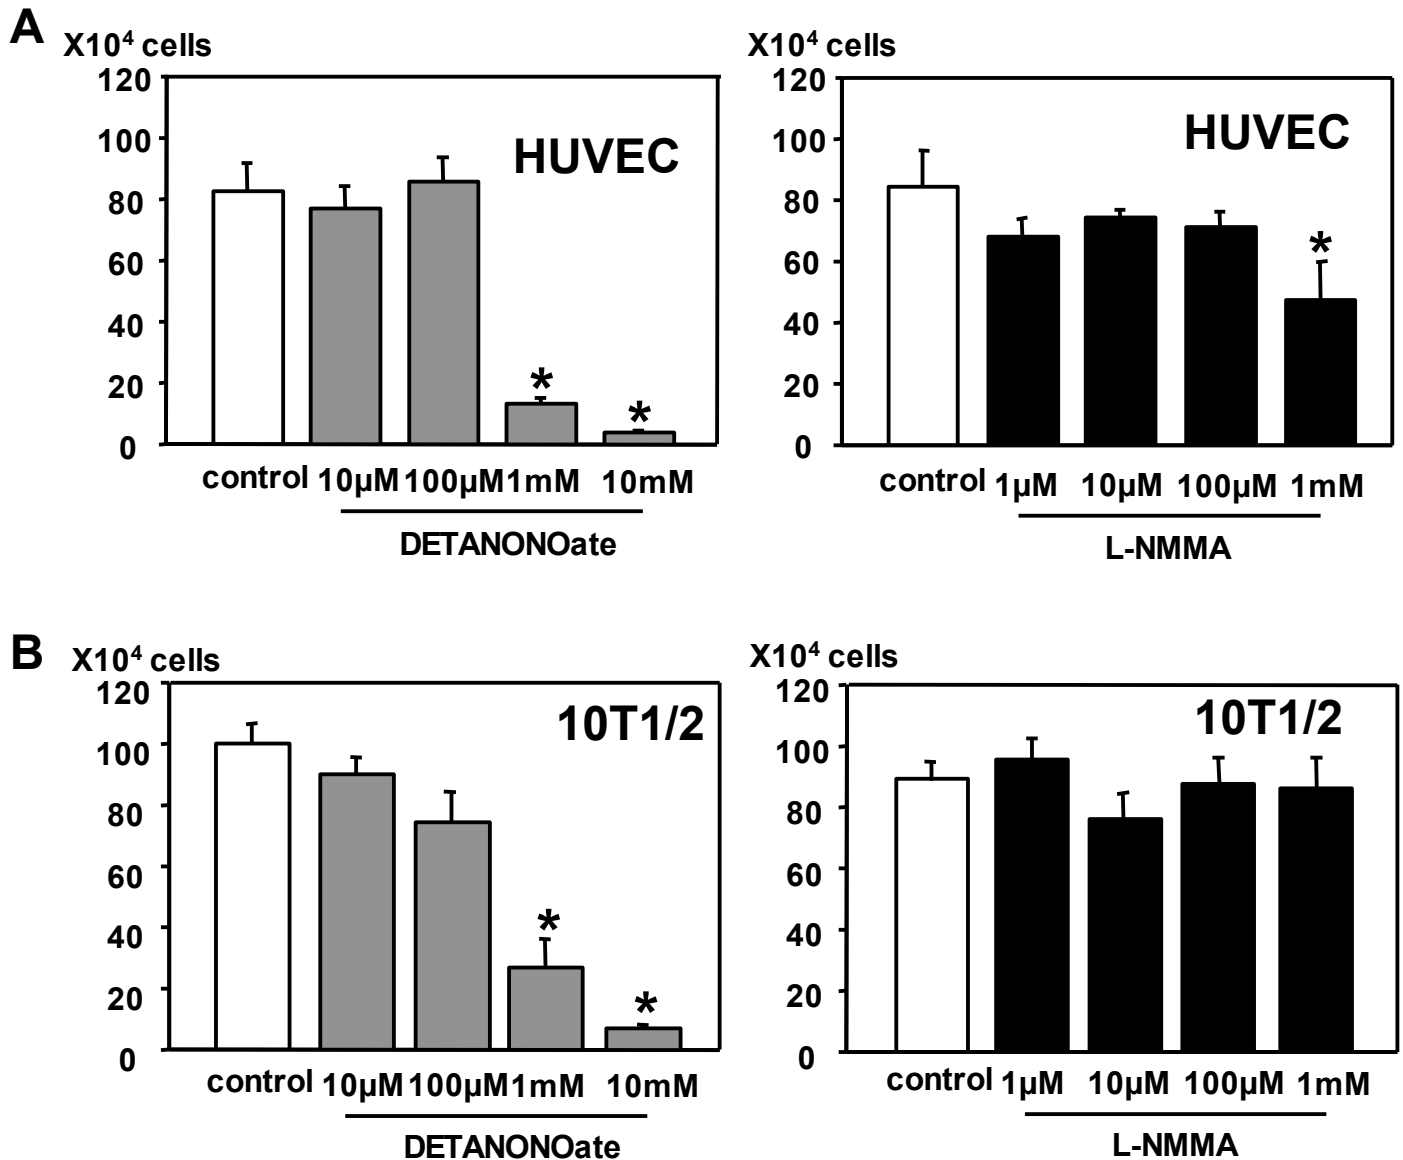

### Supplemental Figure S4

Effects of exogenous NO and NO suppression on HUVECs and 10T1/2 cell proliferation. HUVECs or 10T1/2 cells were plated in uncoated 6-well plates at  $5 \times 10^4$  cells per well in EGM with 2% FBS or BME with 10% FBS, respectively. Twenty-four hours later, the culture medium was changed and the cells were challenged with 1  $\mu$ M, 10  $\mu$ M, 100  $\mu$ M and 1 mM of L-NMMA or with 10  $\mu$ M, 100  $\mu$ M, 1 mM and 10 mM of DETA NONOate in their respective media. Seventy-two hours after the treatment, cells were suspended and number of cells was determined using a hemocytometer. All proliferation assays were conducted in triplicate and each set of experiments was performed at least 5 times.

### Supplemental Table S1.

Vessel morphology of B16 melanomas in paraffin histological specimens.

|                                       | B16F10   | B16F1    | <i>eNOS</i> <sup>-/-</sup> | <i>iNOS</i> <sup>-/-</sup> | D-NMMA   | L-NMMA    |
|---------------------------------------|----------|----------|----------------------------|----------------------------|----------|-----------|
| Vessel Density<br>(/mm <sup>2</sup> ) | 165 ± 17 | 91 ± 21* | 87 ± 9*                    | 140 ± 6                    | 139 ± 17 | 85 ± 16#  |
| Vessel perimeter<br>(μm)              | 67 ± 5   | 93 ± 8*  | 87 ± 8*                    | 57 ± 6                     | 63 ± 5   | 113 ± 11# |

\* # p<0.05 as compared with corresponding B16F10 and D-NMMA treated tumors, respectively. Five random locations per tumor were examined in 3 tumors per group, respectively. The numbers of vessels examined (from the left to the right) are 127, 91, 105, 114, 109, 77.

## Supplemental Table S2.

Angiogenic gene array analysis of B16F10 melanoma.

| gene    | D-NMMA | L-NMMA | gene   | D-NMMA | L-NMMA | gene     | D-NMMA | L-NMMA |
|---------|--------|--------|--------|--------|--------|----------|--------|--------|
| Adamts1 | 0.881  | 0.647  | Figf   | 0.015  | 0.027  | Plau     | 0.242  | 0.192  |
| Adamts8 | 0.019  | 0.015  | Kdr    | 0.172  | 0.183  | Ptgs1    | 0.048  | 0.018  |
| Angpt1  | 0.015  | 0.008  | Flt1   | 0.978  | 0.800  | Ptgs2    | 0.014  | 0.020  |
| Angpt2  | 0.277  | 0.235  | Fn1    | 0.471  | 0.391  | Rsn      | 0.945  | 0.881  |
| Ang     | 0.312  | 0.253  | Cxcl1  | 0.039  | 0.032  | Ccl2     | 0.072  | 0.040  |
| Cd36    | 0.067  | 0.088  | Hgf    | 0.221  | 0.245  | Serpib5  | 0.017  | 0.030  |
| Cdh5    | 0.503  | 0.435  | Hif1a  | 0.949  | 0.885  | Serpine1 | 0.473  | 0.310  |
| Chga    | 0.697  | 0.525  | Idb1   | 0.056  | 0.037  | Serpib2  | 0.013  | 0.023  |
| Col18a1 | 0.051  | 0.030  | Ifna1  | 0.410  | 0.222  | Serpinf1 | 0.008  | 0.011  |
| Csf3    | 0.080  | 0.051  | Ifnb1  | 0.039  | 0.059  | Sparc    | 0.849  | 0.755  |
| Ctgf    | 0.575  | 0.630  | Ifng   | 0.065  | 0.091  | Spp1     | 0.798  | 0.716  |
| Edg1    | 0.744  | 0.536  | Igf1   | 0.070  | 0.078  | Tek      | 0.423  | 0.418  |
| Efna5   | 0.639  | 0.576  | Il10   | 0.050  | 0.043  | Tgfa     | 0.457  | 0.255  |
| Efnb2   | 0.196  | 0.164  | Il12a  | 0.011  | 0.018  | Tgfb1    | 0.402  | 0.346  |
| Egf     | 0.268  | 0.142  | Itga5  | 0.375  | 0.320  | Tgfb2    | 0.558  | 0.560  |
| Egfr    | 0.027  | 0.030  | Itgav  | 0.797  | 0.701  | Tgfb3    | 0.457  | 0.555  |
| Eng     | 0.710  | 0.561  | Itgb3  | 0.205  | 0.295  | Tgfb1    | 0.810  | 0.659  |
| Ephb4   | 0.216  | 0.246  | Smad1  | 0.033  | 0.060  | Tgfb2    | 0.608  | 0.417  |
| Erb2    | 0.037  | 0.071  | Mdk    | 0.007  | 0.014  | Tgfb3    | 0.180  | 0.131  |
| Ets1    | 0.661  | 0.646  | Mmp2   | 0.030  | 0.043  | Thbs1    | 0.123  | 0.214  |
| F2      | 0.011  | 0.014  | Mmp9   | 0.017  | 0.029  | Thbs2    | 0.551  | 0.553  |
| Fgf1    | 0.265  | 0.193  | Msr1   | 0.131  | 0.167  | Thbs3    | 0.020  | 0.021  |
| Fgf16   | 0.545  | 0.438  | Nos3   | 0.459  | 0.286  | Tie1     | 0.194  | 0.153  |
| Fgf2    | 0.019  | 0.012  | Nrp1   | 0.598  | 0.341  | Timp1    | 0.259  | 0.169  |
| Fgf4    | 0.191  | 0.104  | Pdgfa  | 0.443  | 0.305  | Timp2    | 0.686  | 0.578  |
| Fgf6    | 0.051  | 0.033  | Pdgfb  | 0.011  | 0.009  | Tnc      | 0.029  | 0.019  |
| Fgf7    | 0.767  | 0.756  | Pdgfra | 0.020  | 0.036  | Vcam1    | 0.039  | 0.051  |
| Fgfr1   | 0.938  | 1.027  | Pdgfrb | 0.035  | 0.026  | Vegfa    | 0.517  | 0.479  |
| Fgfr3   | 0.126  | 0.144  | Pecam1 | 0.227  | 0.129  | Vegfb    | 0.448  | 0.621  |
| Fgfr4   | 0.243  | 0.127  | Pgf    | 0.276  | 0.146  | Vegfc    | 0.237  | 0.347  |

Three tumors of each treatment group were examined. Values represent relative gene expression normalized to  $\beta$ -actin.

### Supplemental Table S3.

Realtime PCR analysis of endogenous angiogenic and vessel maturation factors.

| gene   | PDGF-B      | Angiopoietin-1 | Angiopoietin-2 | Sphingosine kinase type1 | VEGF-A      |
|--------|-------------|----------------|----------------|--------------------------|-------------|
| D-NMMA | 1.34 ± 0.33 | 1.15 ± 0.28    | 1.22 ± 0.04    | 1.10 ± 0.21              | 1.67 ± 0.53 |
| L-NMMA | 2.08±0.26   | 1.67±0.59      | 1.33±0.19      | 1.74±0.32                | 1.46 ± 0.28 |

  

| gene   | PDGFRβ      | Tie-2       | EDG-1       | VEGFR-1     | VEGFR-2     |
|--------|-------------|-------------|-------------|-------------|-------------|
| D-NMMA | 0.90 ± 0.05 | 0.70 ± 0.02 | 1.46 ± 0.36 | 1.08 ± 0.17 | 1.16 ± 0.05 |
| L-NMMA | 1.19 ± 0.24 | 0.80 ± 0.10 | 2.47 ± 0.34 | 1.63 ± 0.28 | 1.20 ± 0.20 |

Three tumors per each group were independently analyzed. Values represent relative gene expression normalized to β-actin. There was no statistical significant difference between D-NMMA and L-NMMA treated tumors in any factors.

## Supplemental Table S4.

### Realtime PCR primers

| Gene                     | Fam-labeled primer (5'-3')         | Unlabeled primer (5'-3') |
|--------------------------|------------------------------------|--------------------------|
| PDGF-B                   | GACCCTCAGACTTGGGCTTGGAGG[FAM]C     | CTGCCTGCTGGCTTAGCTT      |
| Angiopoietin-1           | CAACCTCGTGCTGGGTCTGG[FAM]TG        | GCAGGGTGAGGTTAGGCTTC     |
| Angiopoietin-2           | CACCAGATCACTTCTACCTCGCTGG[FAM]G    | CCGTGAGTCCTGTAAGGTGAA    |
| Sphingosine kinase type1 | GAACCACAGCTCCCTGGCATGG[FAM]TC      | CAGAGTGCTGGTGCTGCTGA     |
| VEGF-A                   | CACTCCTAACGATGAAGCCCTGGAG[FAM]G    | TTGGTCTGCATTCACATCTGC    |
| PDGFR $\beta$            | CAACATCCATTCTCGATCACAGAGATG[FAM]TG | TGAGTGATTCGGGCACCTAT     |
| Tie-2                    | GACCATTGTTGACGCATCTTCATGG[FAM]C    | GCCTTAATGAACCAGCACCAA    |
| EDG-1                    | CACAAAGCGGGAAGGGAGTATGTTTG[FAM]G   | AGCTGTTGCTCCC GTTGTGT    |
| VEGFR-1                  | CGGAAGAGGTAGTTGGACAGGTTTC[FAM]G    | CAAGGAGGGCCTCTGATGGT     |
| VEGFR-2                  | CGGACACAGTGGGCAGTCAAGTC[FAM]G      | GGGCCTCCATTTCTGTACCAT    |
| $\beta$ -actin           | CACAGGTCTTGGGTATGGAATCCTG[JOE]G    | TCTTTACGGATGTCAACGTCA    |

Note that  $\beta$ -actin was JOE-labeled and the genes of interest were FAM-labeled.
